# Supplementary material for: MCuB7O12·nH2O (M = Na, K ): A new copper borate with 14-ring channels
Source: Royal Society of Chemistry journal article supplement (doi:10.1039/b506901g), 2005-01-01
Supplement: b506901g.pdf [file b506901g.pdf]

Electronic Supplementary Information for:

**MCuB<sub>7</sub>O<sub>12</sub>·nH<sub>2</sub>O (M=Na, K ): A new copper borate with  
14-ring channel**

**Tao yang<sup>a</sup>, Guobao Li<sup>a</sup>, Liping You<sup>b</sup>, Jing Ju<sup>a</sup>, Fuhui Liao<sup>a</sup>, Jianhua Lin<sup>\*a</sup>**

<sup>a</sup> State Key Laboratory of Rare Earth Materials Chemistry and Applications, College of Chemistry and Molecular Engineering, Peking University, Beijing 100871, P. R. China. Fax: 8610-62751708; Tel:8610-62751715; E-mail: jhlin@pku.edu.cn

<sup>b</sup> Electron Microscopy Laboratory, College of Physics, Peking University, Beijing 100871, P. R. China. E-mail: youlp@pku.edu.cn

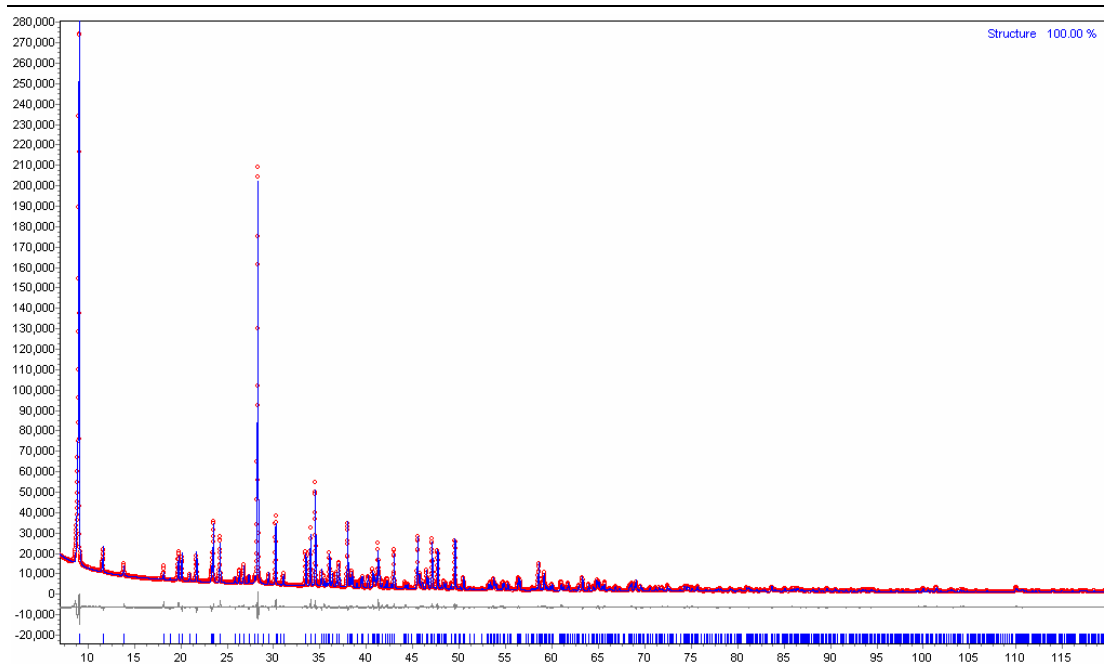

Figure S1. Rietveld plot of the powder X-ray diffraction pattern of  $\text{NaCuB}_7\text{O}_{12} \cdot n\text{H}_2\text{O}$ . The symbol  $\bullet$  represents observed pattern and the solid line is the calculated pattern; the marks below the diffraction patterns are the reflection positions and, the difference curve is also shown below the diffraction curves.

Table S1. Refined atomic parameters of  $\text{NaCuB}_7\text{O}_{12} \cdot n\text{H}_2\text{O}^*$

| site | x         | y         | z          | $U_{\text{eq}}$ |
|------|-----------|-----------|------------|-----------------|
| Na   | 0.2094(3) | 0.4090(8) | 0          | 0.0783(2)       |
| Cu   | 0         | 0         | 0.40044(7) | 0.0093(4)       |
| B1   | 0.1218(7) | 0.438(2)  | 0.5        | 0.0088(2)       |
| B2   | 0.1846(5) | 0.561(1)  | 0.1913(4)  | 0.0088(2)       |
| B3   | 0.0622(6) | 0.207(1)  | 0.2181(4)  | 0.0088(2)       |
| B4   | 0.1740(5) | 0.411(1)  | 0.3467(4)  | 0.0088(2)       |
| O1   | 0         | 0         | 0.1851(3)  | 0.0051(1)       |
| O2   | 0.0697(4) | 0.1811(9) | 0.5        | 0.0051(1)       |
| O3   | 0.1114(3) | 0.3773(7) | 0.1613(2)  | 0.0051(1)       |
| O4   | 0.1402(2) | 0.5730(6) | 0.4228(2)  | 0.0051(1)       |
| O5   | 0.2553(3) | 0.2111(7) | 0.3696(2)  | 0.0051(1)       |
| O6   | 0.0794(3) | 0.2304(7) | 0.3103(2)  | 0.0051(1)       |
| O7   | 0.2025(3) | 0.6145(6) | 0.2789(2)  | 0.0051(1)       |
| O8   | 0.9018(5) | 0.047(2)  | 0          | 0.1591(2)       |

\* Pnmm (No. 58),  $a = 12.73720(8) \text{ \AA}$ ,  $b = 4.69546(3) \text{ \AA}$ ,  $c = 15.17928(9) \text{ \AA}$ ,  $V = 907.83(2) \text{ \AA}^3$ ,  $R_p$   
 $= 0.038$ ,  $R_{wp} = 0.053$

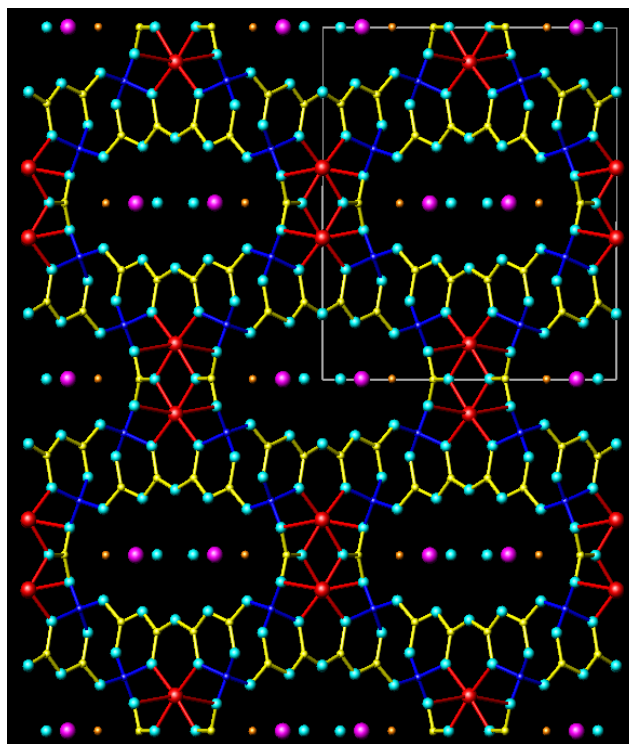

Figure S2. A view along the b axis of the structure of  $\text{Li}_{0.45}\text{Na}_{0.55}\text{CuB}_7\text{O}_{12} \cdot n\text{H}_2\text{O}$ .

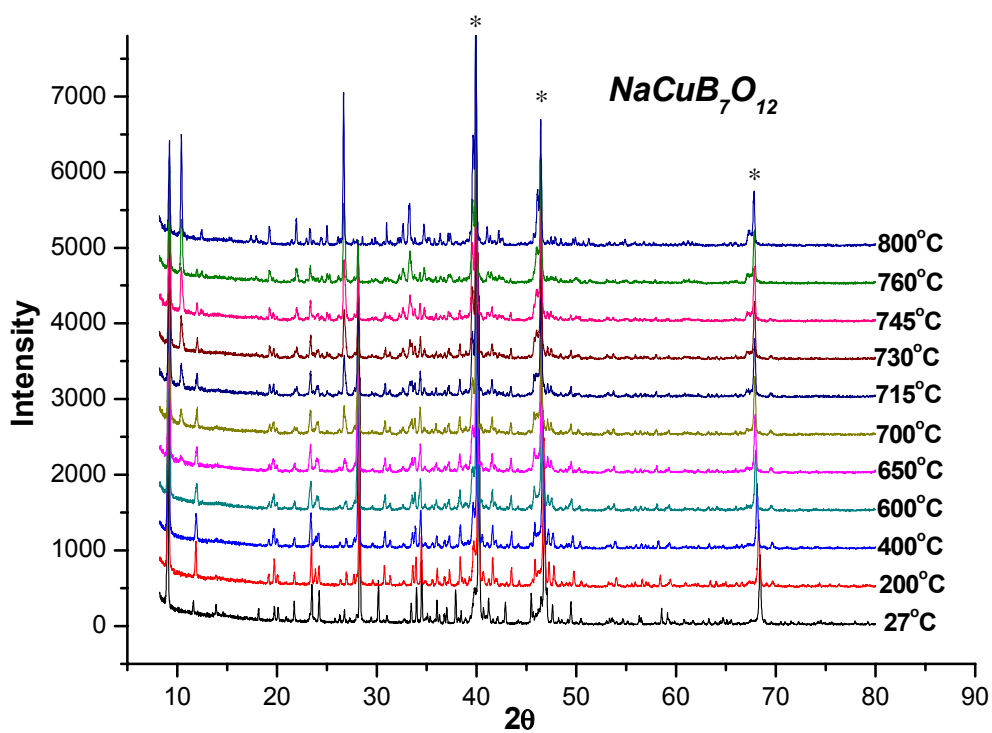

Figure S4. In situ powder X-ray diffraction of  $\text{NaCuB}_7\text{O}_{12} \cdot n\text{H}_2\text{O}$ . The peaks marked with \* correlated to the Pt substrate on which our sample was placed.

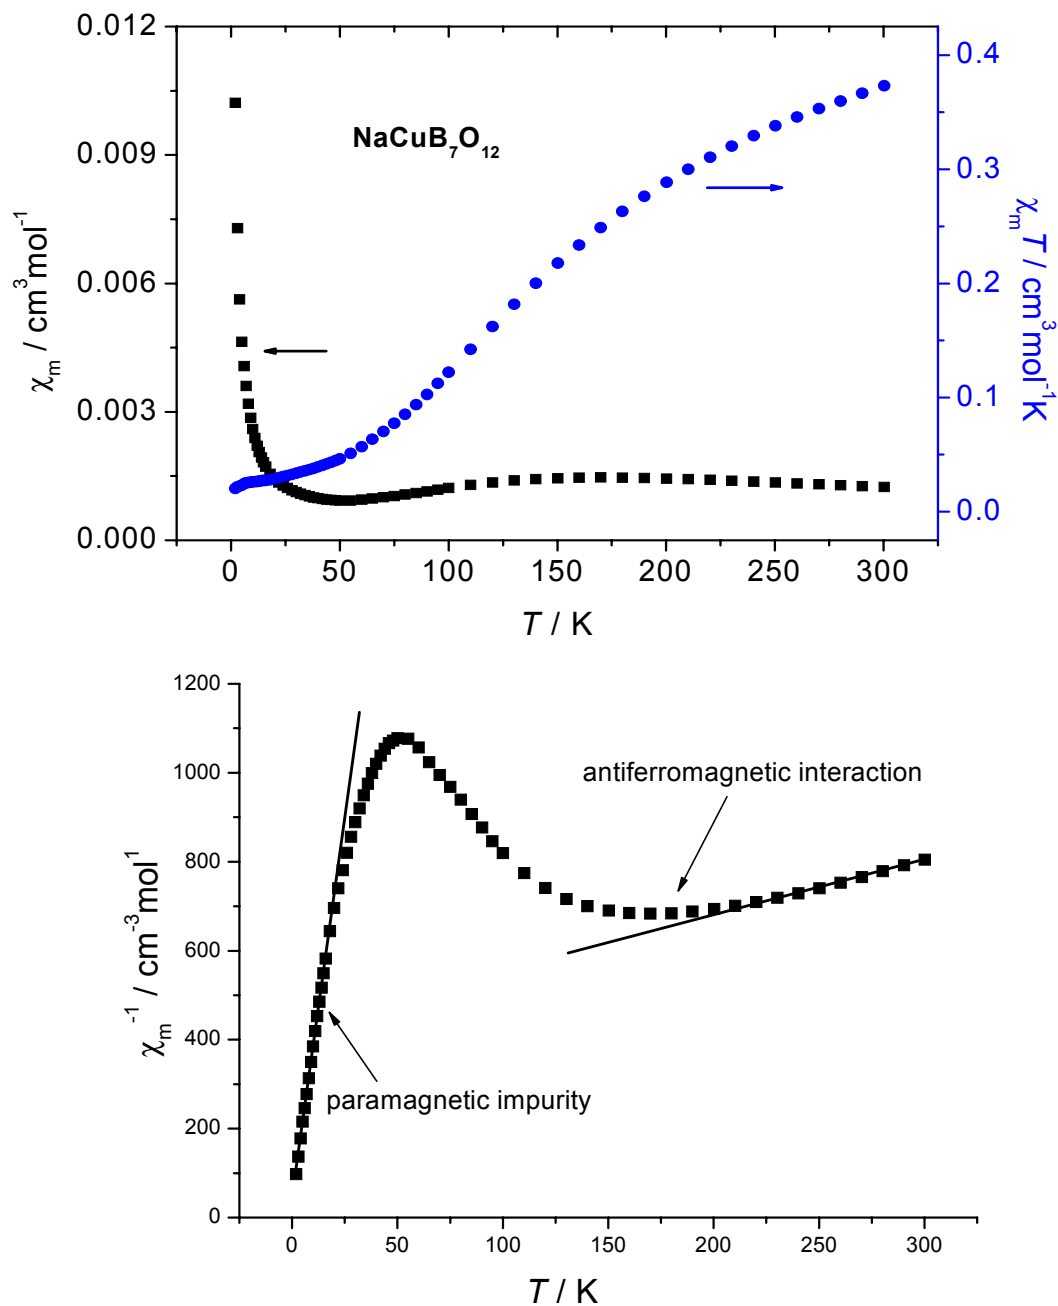

Figure S4. The temperature dependence of the magnetic susceptibility of  $\text{NaCuB}_7\text{O}_{12} \cdot n\text{H}_2\text{O}$  in an applied field of 5000 Oe. Because the existence of paramagnetic impurity, the data above 250K fit the Curie-Weiss law with the  $\theta = -323\text{K}$ .

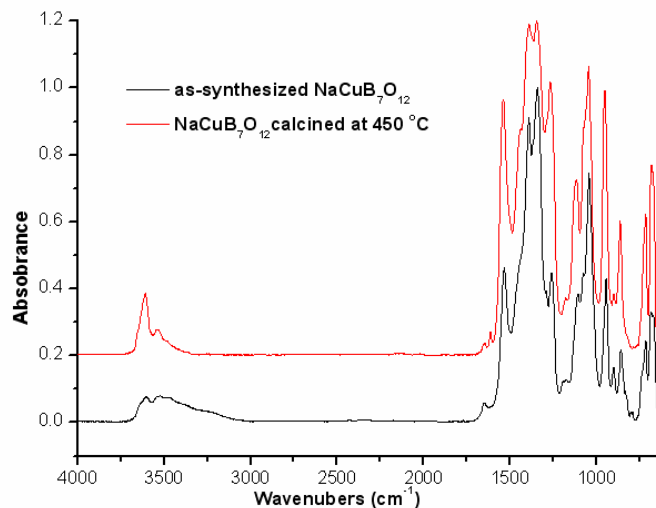

Figure S5. The IR spectra of the as-synthesized NaCuB<sub>7</sub>O<sub>12</sub>·nH<sub>2</sub>O ( in black ) and the NaCuB<sub>7</sub>O<sub>12</sub>·nH<sub>2</sub>O ( calcined at 450 °C, in red ). It shows that the framework remains intact after heating and an obvious dehydrate-rehydrate behavior of water. The heated powder can rehydrate just the time we test its IR spectrum. The peaks between 1000 cm<sup>-1</sup> to 1200 cm<sup>-1</sup> correspond to the BO<sub>4</sub> group of the structure and that between 1200 cm<sup>-1</sup> to 1400 cm<sup>-1</sup> correspond to the BO<sub>3</sub> group. The existence of water can be distinguished by the peaks about 3600 cm<sup>-1</sup>.

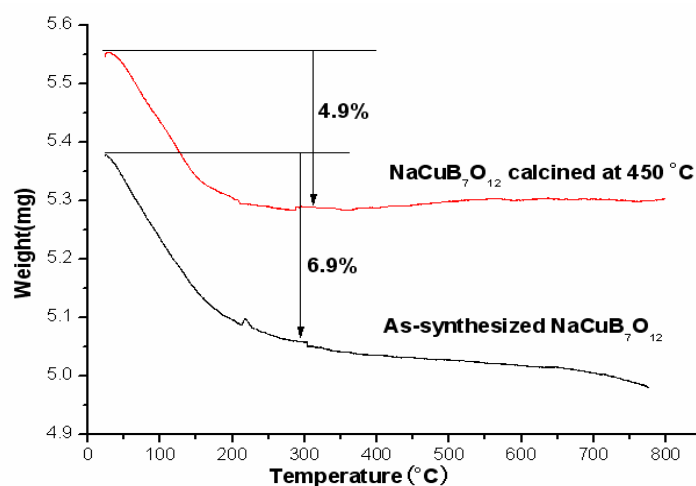

Figure S6. The TGA analysis of the as-synthesized  $\text{NaCuB}_7\text{O}_{12} \cdot n\text{H}_2\text{O}$  ( in black) and the  $\text{NaCuB}_7\text{O}_{12} \cdot n\text{H}_2\text{O}$  which are calcined at  $450^\circ\text{C}$  and then exposed itself to air for several hours ( in red ), gives another evidence that it has a dehydrate-rehydrate behavior of water.

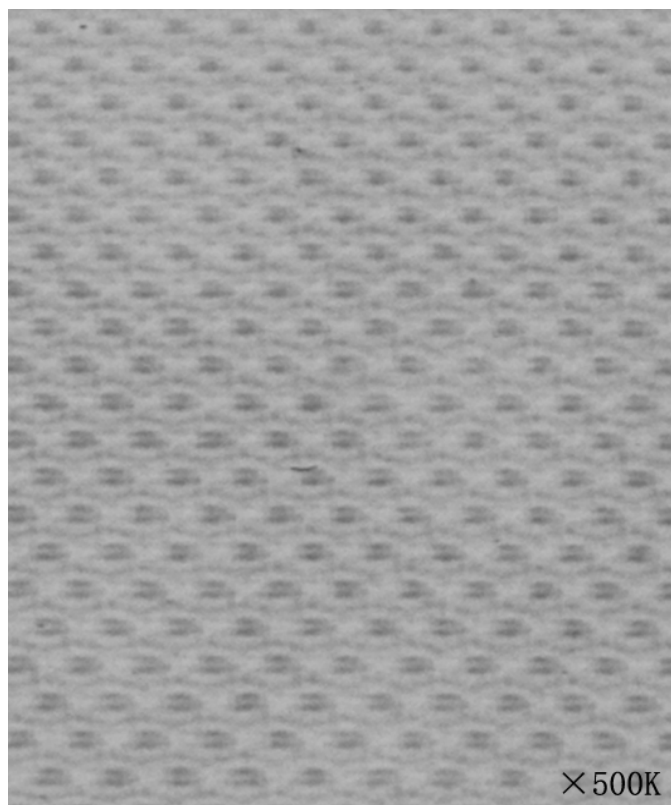

Figure S7. The HRTEM image of  $\text{NaCuB}_7\text{O}_{12} \cdot n\text{H}_2\text{O}$  in the 010 zone carried on an H-9000 transmission electron microscope.
